# Supplementary material for: Th1, Th2 and Th17 inflammatory pathways synergistically predict cardiometabolic protein expression in serum of COVID-19 patients
Source: Royal Society of Chemistry journal article supplement (doi:10.1039/d2mo00055e), 2022-03-07
Supplement: d2mo00055e1.xlsx [file d2mo00055e1.xlsx]

## Sheet: Th1
marker	Mean_Estimate_Deceased	Mean_Estimate_Intubated	Mean_Estimate_NonSevere	lgFCH_Deceased_vs_Intubated	FCH_Deceased_vs_Intubated	p_Deceased_vs_Intubated	lgFCH_Deceased_vs_NonSevere	FCH_Deceased_vs_NonSevere	p_Deceased_vs_NonSevere	lgFCH_Intubated_vs_NonSevere	FCH_Intubated_vs_NonSevere	p_Intubated_vs_NonSevere
CCL3	3.83967	3.75856	3.3757	0.08111	1.05783	0.632851	0.463969	1.37933	0.00170201	0.382859	1.30392	0.00186171
CCL4	4.53305	4.4507	4.18386	0.0823577	1.05875	0.609644	0.349191	1.27385	0.0126528	0.266833	1.20316	0.0219586
CCL5	3.05854	3.4979	3.52167	-0.439366	-1.35601	0.0892383	-0.463136	-1.37853	0.0383521	-0.0237699	-1.01661	0.898016
CXCL10	8.06708	8.02706	7.06041	0.0400168	1.02813	0.869028	1.00667	2.00927	2.43713e-06	0.966652	1.9543	6.44543e-08
CXCL11	5.42062	5.47343	5.09366	-0.0528129	-1.03729	0.79439	0.326961	1.25437	0.0625639	0.379774	1.30114	0.00954383
CXCL9	4.75599	4.62612	3.95824	0.129866	1.09419	0.541683	0.79775	1.73839	1.91192e-05	0.667884	1.58874	1.7124e-05
IFNG	2.91263	3.20019	3.55989	-0.287551	-1.22057	0.444137	-0.647254	-1.56618	0.047345	-0.359703	-1.28316	0.180299
IFNGR1	1.7354	1.36416	1.1743	0.371248	1.29347	0.0001087	0.561105	1.4754	3.86729e-11	0.189857	1.14065	0.00561499
IFNGR2	2.28806	2.55425	2.21438	-0.266197	-1.20263	0.0370794	0.073673	1.05239	0.502824	0.33987	1.26564	0.000238926
IL1B	0.972867	0.715585	0.551015	0.257282	1.19522	0.0270924	0.421851	1.33965	3.30086e-05	0.16457	1.12083	0.0490947
IL2RA	5.35906	5.16814	4.90414	0.190921	1.14149	0.145873	0.454916	1.3707	7.32019e-05	0.263995	1.2008	0.00537757

## Sheet: Th2
marker	Mean_Estimate_Deceased	Mean_Estimate_Intubated	Mean_Estimate_NonSevere	lgFCH_Deceased_vs_Intubated	FCH_Deceased_vs_Intubated	p_Deceased_vs_Intubated	lgFCH_Deceased_vs_NonSevere	FCH_Deceased_vs_NonSevere	p_Deceased_vs_NonSevere	lgFCH_Intubated_vs_NonSevere	FCH_Intubated_vs_NonSevere	p_Intubated_vs_NonSevere
CCL11	6.86727	6.34058	6.34376	0.526683	1.44061	0.000114259	0.523509	1.43745	9.80117e-06	-0.00317458	-1.0022	0.973879
CCL13	6.44112	6.23976	6.16319	0.201357	1.14978	0.204937	0.277927	1.21245	0.0432766	0.0765704	1.05451	0.502207
CCL17	4.20771	4.24785	4.60688	-0.0401427	-1.02822	0.845314	-0.39917	-1.31875	0.0253305	-0.359027	-1.28256	0.0157327
CCL22	5.19659	5.28663	5.44823	-0.0900394	-1.0644	0.488051	-0.251639	-1.19056	0.0254352	-0.161599	-1.11853	0.0841368
CCL24	5.22913	4.65241	4.63922	0.576726	1.49146	0.0312715	0.589911	1.50515	0.0109013	0.013185	1.00918	0.9452
CCL26	1.94728	1.85864	1.74345	0.0886404	1.06337	0.668685	0.203824	1.15175	0.255128	0.115183	1.08311	0.439454
CCL7	5.45315	5.70603	4.33409	-0.252887	-1.19159	0.35047	1.11906	2.17205	2.62101e-06	1.37195	2.5882	1.1812e-11
TSLP	0.124193	0.165269	0.166628	-0.0410758	-1.02888	0.640193	-0.0424352	-1.02985	0.576227	-0.0013594	-1.00094	0.982833
IL10	0.392479	0.395799	0.121696	-0.00331994	-1.0023	0.989468	0.270782	1.20646	0.213273	0.274102	1.20924	0.130328
IL13	-0.185176	-0.0866254	-0.0892153	-0.0985508	-1.0707	0.303685	-0.0959609	-1.06878	0.246463	0.00258993	1.0018	0.969987
IL33	0.145867	0.17389	0.0534077	-0.0280229	-1.01961	0.716487	0.092459	1.06619	0.166098	0.120482	1.0871	0.0305232
IL4R	3.97488	3.61507	3.07393	0.359804	1.28325	0.0474308	0.900952	1.8673	1.97027e-08	0.541148	1.45513	4.09237e-05
IL5	0.0879571	0.389097	0.188048	-0.30114	-1.23212	0.171847	-0.100091	-1.07184	0.598658	0.201049	1.14953	0.204498
IL7R	4.05711	3.70896	3.96235	0.348148	1.27293	0.00822645	0.0947578	1.06789	0.402652	-0.25339	-1.192	0.00748445

## Sheet: Th17
marker	Mean_Estimate_Deceased	Mean_Estimate_Intubated	Mean_Estimate_NonSevere	lgFCH_Deceased_vs_Intubated	FCH_Deceased_vs_Intubated	p_Deceased_vs_Intubated	lgFCH_Deceased_vs_NonSevere	FCH_Deceased_vs_NonSevere	p_Deceased_vs_NonSevere	lgFCH_Intubated_vs_NonSevere	FCH_Intubated_vs_NonSevere	p_Intubated_vs_NonSevere
S100A12	6.28179	6.37078	5.71213	-0.0889901	-1.06363	0.517601	0.569659	1.48417	2.5e-06	0.658649	1.5786	1.23e-10
S100P	2.40616	2.02399	1.42661	0.38217	1.3033	0.032771	0.979554	1.97186	7.32e-10	0.597384	1.51297	4.7e-06
CCL20	6.25004	5.6281	4.88522	0.621936	1.53894	0.0197999	1.36482	2.57544	7.41e-09	0.742884	1.67352	0.000122653
LCN2	3.08612	2.52012	2.2002	0.566001	1.48041	0.000796391	0.885925	1.84795	2.61e-09	0.319923	1.24826	0.00814736
PI3	2.85841	1.78492	1.67154	1.07349	2.10451	2.17e-05	1.18687	2.27659	7.24e-08	0.113384	1.08176	0.526691
CXCL1	3.87511	3.57267	3.53387	0.302443	1.23323	0.111447	0.34124	1.26685	0.0379238	0.0387977	1.02726	0.775992
CXCL3	4.79167	4.7845	5.07827	0.00717203	1.00498	0.97909	-0.286603	-1.21976	0.225943	-0.293775	-1.22584	0.136135
IL12A	4.27674	4.33336	4.44421	-0.056621	-1.04003	0.782909	-0.167472	-1.12309	0.345851	-0.110851	-1.07987	0.453321
IL12B	5.547	5.56645	5.67979	-0.019446	-1.01357	0.918413	-0.132789	-1.09641	0.4184	-0.113343	-1.08173	0.406623
IL17A	0.827764	0.410578	0.449506	0.417187	1.33532	3.26e-05	0.378258	1.29977	1.34e-05	-0.0389285	-1.02735	0.584485
IL17F	0.561443	0.381466	0.410569	0.179977	1.13287	0.223551	0.150874	1.11024	0.237566	-0.0291032	-1.02038	0.784056
IL6	7.18897	6.76318	5.17777	0.425785	1.3433	0.144768	2.0112	4.03118	2.8e-14	1.58542	3.00094	4.53e-13
IL6R	4.35899	4.28081	4.31234	0.0781791	1.05568	0.402947	0.0466463	1.03286	0.563405	-0.0315329	-1.0221	0.638831
