# Supplementary material for: Th1, Th2 and Th17 inflammatory pathways synergistically predict cardiometabolic protein expression in serum of COVID-19 patients
Source: Royal Society of Chemistry journal article supplement (doi:10.1039/d2mo00055e), 2022-03-07
Supplement: d2mo00055e2.xlsx [file d2mo00055e2.xlsx]

## Sheet: Th1
marker	Mean_Estimate_Deceased	Mean_Estimate_Intubated	Mean_Estimate_NonSevere	lgFCH_Deceased_vs_Intubated	FCH_Deceased_vs_Intubated	p_Deceased_vs_Intubated	lgFCH_Deceased_vs_NonSevere	FCH_Deceased_vs_NonSevere	p_Deceased_vs_NonSevere	lgFCH_Intubated_vs_NonSevere	FCH_Intubated_vs_NonSevere	p_Intubated_vs_NonSevere
CCL3	3.81841	3.47856	3.51196	0.339858	1.26563	0.499544	0.306456	1.23667	0.491767	-0.0334019	-1.02342	0.915559
CCL4	4.6149	4.60968	4.5691	0.00521875	1.00362	0.991049	0.0458036	1.03226	0.91147	0.0405849	1.02853	0.889309
CCL5	1.84906	3.40845	3.02596	-1.55939	-2.9473	0.00728145	-1.1769	-2.26091	0.0213322	0.38249	1.30359	0.283761
CXCL10	5.23729	4.69601	5.05204	0.541279	1.45526	0.372925	0.185248	1.13701	0.729995	-0.356032	-1.2799	0.349913
CXCL11	3.48029	3.75589	3.69185	-0.275602	-1.2105	0.639699	-0.211565	-1.15794	0.684838	0.0640366	1.04539	0.86215
CXCL9	4.33153	4.04946	4.43715	0.282072	1.21594	0.664552	-0.105626	-1.07596	0.854434	-0.387698	-1.3083	0.342817
IFNG	0.806157	0.217612	1.64617	0.588545	1.50373	0.622502	-0.84001	-1.79006	0.428101	-1.42855	-2.69177	0.0593898
IFNGR1	1.74293	1.69275	1.56355	0.0501786	1.03539	0.864894	0.179379	1.1324	0.49281	0.129201	1.09369	0.48526
IFNGR2	2.00411	1.9355	1.82002	0.0686143	1.04871	0.80086	0.184094	1.1361	0.445526	0.11548	1.08334	0.498799
IL1B	0.470757	1.01726	0.784813	-0.546505	-1.46054	0.188913	-0.314056	-1.2432	0.392315	0.23245	1.17483	0.37116
IL2RA	5.1694	5.06019	5.12344	0.109212	1.07864	0.764208	0.0459636	1.03237	0.886612	-0.0632489	-1.04482	0.781658

## Sheet: Th2
marker	Mean_Estimate_Deceased	Mean_Estimate_Intubated	Mean_Estimate_NonSevere	lgFCH_Deceased_vs_Intubated	FCH_Deceased_vs_Intubated	p_Deceased_vs_Intubated	lgFCH_Deceased_vs_NonSevere	FCH_Deceased_vs_NonSevere	p_Deceased_vs_NonSevere	lgFCH_Intubated_vs_NonSevere	FCH_Intubated_vs_NonSevere	p_Intubated_vs_NonSevere
CCL11	6.5765	7.02829	6.53106	-0.451794	-1.36774	0.198314	0.04544	1.032	0.883207	0.497234	1.4115	0.0255229
CCL13	6.09851	6.26226	6.22395	-0.163748	-1.12019	0.690231	-0.125435	-1.09084	0.730247	0.0383134	1.02691	0.881681
CCL17	4.77947	5.39871	5.34092	-0.619241	-1.53607	0.234315	-0.561447	-1.47575	0.223448	0.0577943	1.04087	0.858792
CCL22	4.95129	5.41766	5.5982	-0.466377	-1.38164	0.166933	-0.646918	-1.56582	0.0319234	-0.180541	-1.13331	0.391456
CCL24	6.52173	6.84676	5.87684	-0.325028	-1.25269	0.564903	0.644887	1.56362	0.199176	0.969914	1.95872	0.0074154
CCL26	1.70696	1.67498	1.33782	0.0319759	1.02241	0.945263	0.369135	1.29158	0.372048	0.337159	1.26327	0.250208
CCL7	3.13351	2.63349	2.60929	0.500027	1.41424	0.282295	0.524225	1.43816	0.203751	0.0241984	1.01691	0.933587
TSLP	0.175114	0.173731	0.164376	0.00138304	1.00096	0.995387	0.0107379	1.00747	0.95957	0.00935489	1.00651	0.950249
IL10	0.288514	-0.0308312	0.399467	0.319346	1.24776	0.464754	-0.110953	-1.07994	0.773917	-0.430299	-1.34751	0.11841
IL13	-0.170471	-0.249913	-0.0255273	0.0794411	1.05661	0.763805	-0.144944	-1.10569	0.53624	-0.224385	-1.16828	0.178217
IL33	0.0171571	0.223506	0.166816	-0.206349	-1.15376	0.319631	-0.149659	-1.10931	0.41451	0.0566899	1.04008	0.661841
IL4R	3.35089	3.55358	3.25869	-0.202696	-1.15085	0.668005	0.092193	1.06599	0.82557	0.294889	1.22679	0.320813
IL5	0.356757	0.340706	0.693925	0.0160509	1.01119	0.976996	-0.337168	-1.26327	0.494641	-0.353219	-1.27741	0.313012
IL7R	4.72999	4.62692	4.44011	0.103061	1.07405	0.77501	0.289871	1.22253	0.365154	0.18681	1.13824	0.409421

## Sheet: Th17
marker	Mean_Estimate_Deceased	Mean_Estimate_Intubated	Mean_Estimate_NonSevere	lgFCH_Deceased_vs_Intubated	FCH_Deceased_vs_Intubated	p_Deceased_vs_Intubated	lgFCH_Deceased_vs_NonSevere	FCH_Deceased_vs_NonSevere	p_Deceased_vs_NonSevere	lgFCH_Intubated_vs_NonSevere	FCH_Intubated_vs_NonSevere	p_Intubated_vs_NonSevere
S100A12	5.72876	6.06421	5.85205	-0.335449	-1.26177	0.351617	-0.123288	-1.08921	0.698372	0.212161	1.15842	0.347308
S100P	2.95917	2.70082	2.07499	0.258353	1.19611	0.609955	0.884182	1.84572	0.0513897	0.62583	1.5431	0.0513939
CCL20	5.49887	5.12717	5.28746	0.371703	1.29388	0.638851	0.211411	1.15782	0.762991	-0.160291	-1.11751	0.746693
LCN2	2.94147	3.17935	2.90586	-0.237879	-1.17926	0.651348	0.0356151	1.02499	0.939059	0.273494	1.20873	0.407929
PI3	2.87191	2.45379	2.23681	0.418127	1.33619	0.465291	0.635103	1.55305	0.211994	0.216977	1.1623	0.545291
CXCL1	3.8285	3.34211	3.1508	0.486387	1.40093	0.4052	0.677702	1.59959	0.191815	0.191314	1.1418	0.600926
CXCL3	3.81073	4.56912	4.62616	-0.75839	-1.6916	0.278115	-0.815428	-1.75982	0.188707	-0.0570376	-1.04033	0.896059
IL12A	3.30249	4.29444	4.56691	-0.991958	-1.98888	0.096154	-1.26443	-2.40232	0.0176983	-0.272471	-1.20787	0.462585
IL12B	4.51177	5.37698	5.73965	-0.86521	-1.8216	0.128247	-1.22788	-2.34222	0.0159952	-0.36267	-1.2858	0.306998
IL17A	0.796386	0.63395	0.743722	0.162436	1.11918	0.53716	0.0526639	1.03718	0.821057	-0.109772	-1.07906	0.505924
IL17F	0.540414	0.308581	0.549616	0.231833	1.17433	0.581332	-0.00920208	-1.0064	0.980261	-0.241035	-1.18184	0.361212
IL6	5.29994	5.77332	4.97965	-0.473382	-1.38836	0.659955	0.320288	1.24858	0.736682	0.79367	1.73348	0.241117
IL6R	4.07757	4.29653	4.17571	-0.21896	-1.16389	0.369367	-0.0981431	-1.07039	0.648915	0.120817	1.08735	0.429127
